# Supplementary material
Source: PubMed Central journal article supplement (PMC3393636)
Supplement: NIHMS49111-supplement-Supplemental_Figure.pdf [file NIHMS49111-supplement-Supplemental_Figure.pdf]

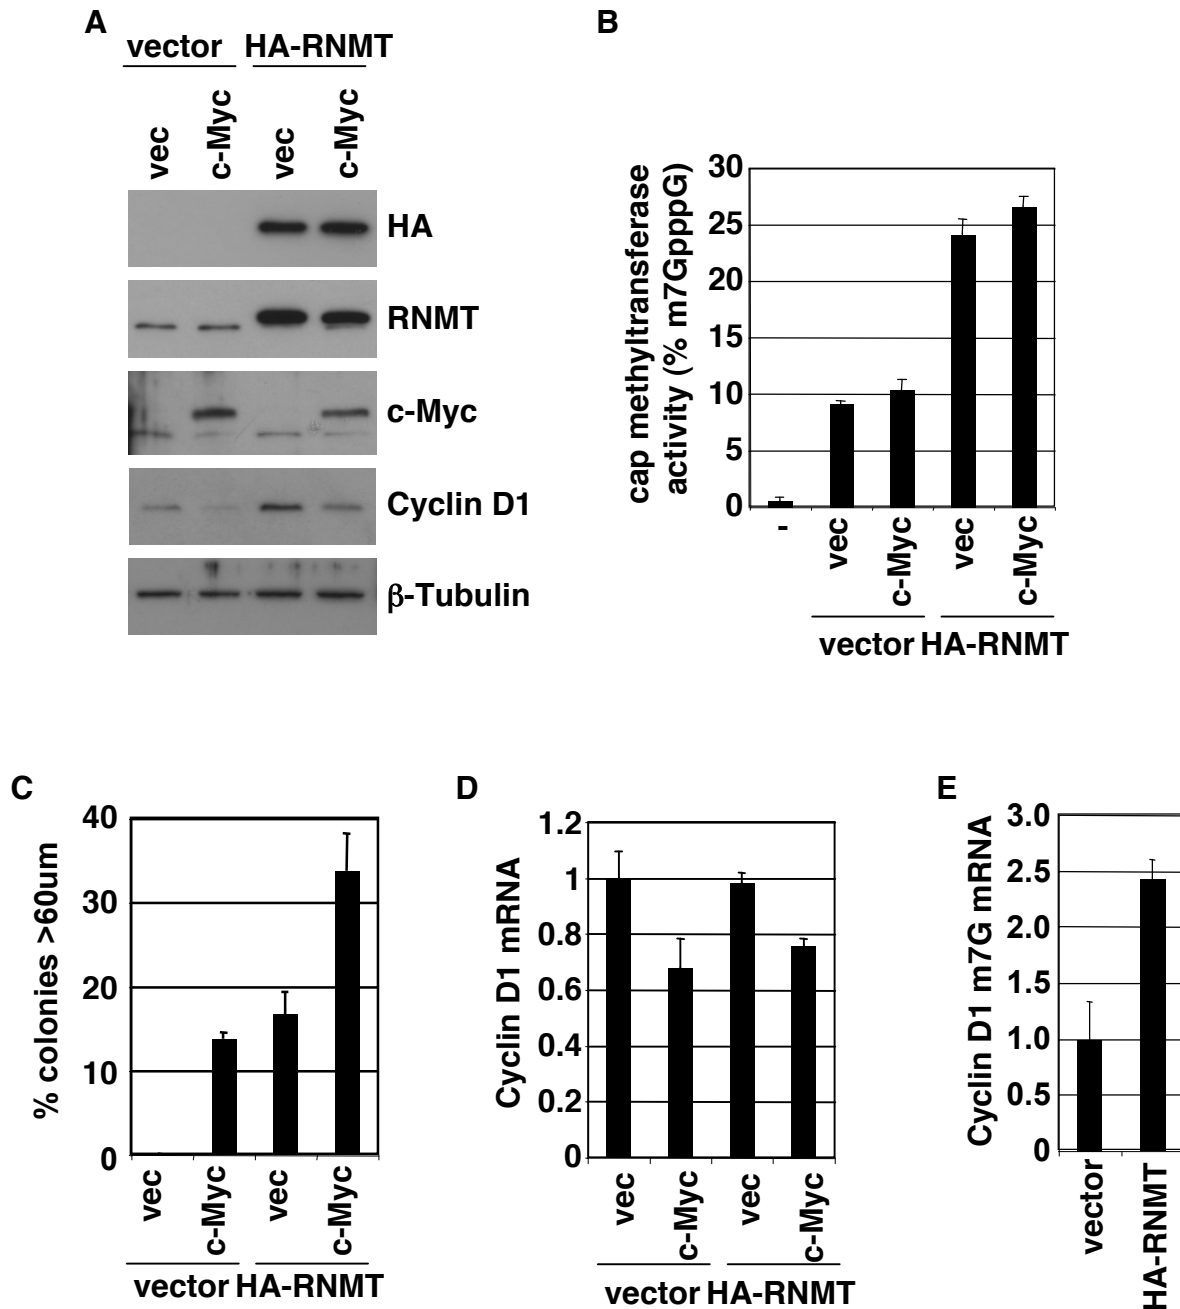

**Increased HA-RNMT expression increases cellular cap methyltransferase activity, cell transformation and Cyclin D1 mRNA cap methylation and expression.**

a) Whole cell extracts from the IMEC (Tert-immortalised human mammary epithelial cell) lines indicated were analysed by Western Blot for expression of RNMT, HA-RNMT, c-MYC, Cyclin D1 and  $\beta$ -Tubulin. b) The same extracts were analysed for their cap methyltransferase activity as described in the legend for figure 1. c) The soft agar cell transformation assay was performed, as described in the legend for figure 2. d) Relative Cyclin D1 mRNA and e) Cyclin D1 m7G mRNA was determined, as described in the legend for figure 3.
